# Supplementary material for: Biogenic-magnesium oxide nanoparticles from Bauhinia variegata (Kachnar) flower extract: a sustainable electrochemical approach for vitamin-B 12 determination in real fruit juice and milk
Source: Royal Society of Chemistry journal article supplement (doi:10.1039/d3fb00198a), 2024-01-01
Supplement: d3fb00198a1.pdf [file d3fb00198a1.pdf]

## Supplementary Information

### **Biogenic-Magnesium Oxide Nanoparticles from *Bauhinia Variegata* (Kachnar) Flower Extract: A Sustainable Electrochemical Approach for Vitamin-B<sub>12</sub> Determination in Real Fruit Juice and Milk**

Sarita Shaktawat, Rahul Verma, Kshitij RB Singh, Jay Singh\*

Department of Chemistry, Institute of Sciences, Banaras Hindu University. Varanasi  
(221005), Uttar Pradesh –India

\*Corresponding author (Email: [jaysingh.chem@bhu.ac.in](mailto:jaysingh.chem@bhu.ac.in); ORCID ID: 0000-0002-3793-0450;

Phone: +91-9871766453)

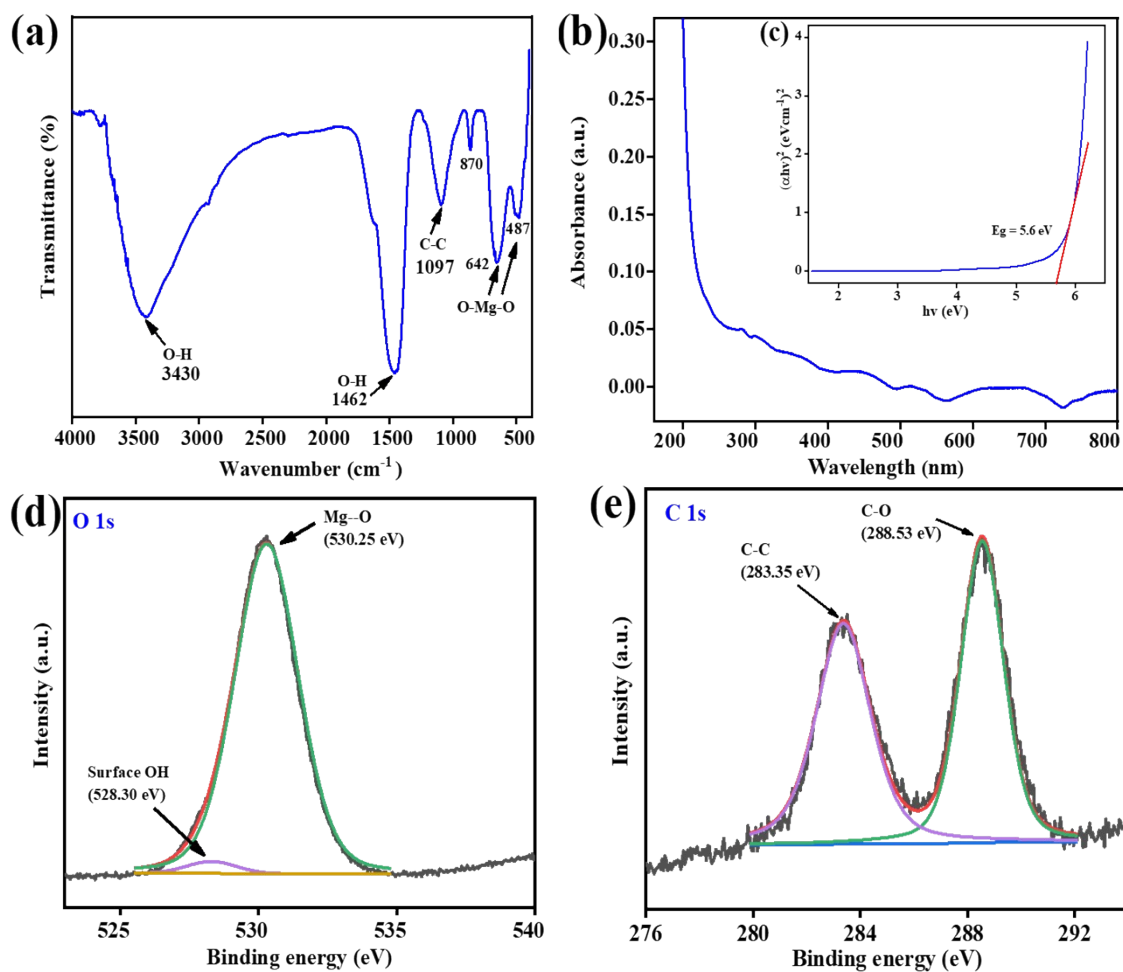

**Figure S1.** (a) FTIR spectra of functional groups in B-MgO NPs, (b) UV spectra with (inset Figure c) Tauc's plot for band gap analysis, and (d&e) XPS analysis of O (1s) spectra, and C(1s) spectra in green contaminant of B-MgO NPs.

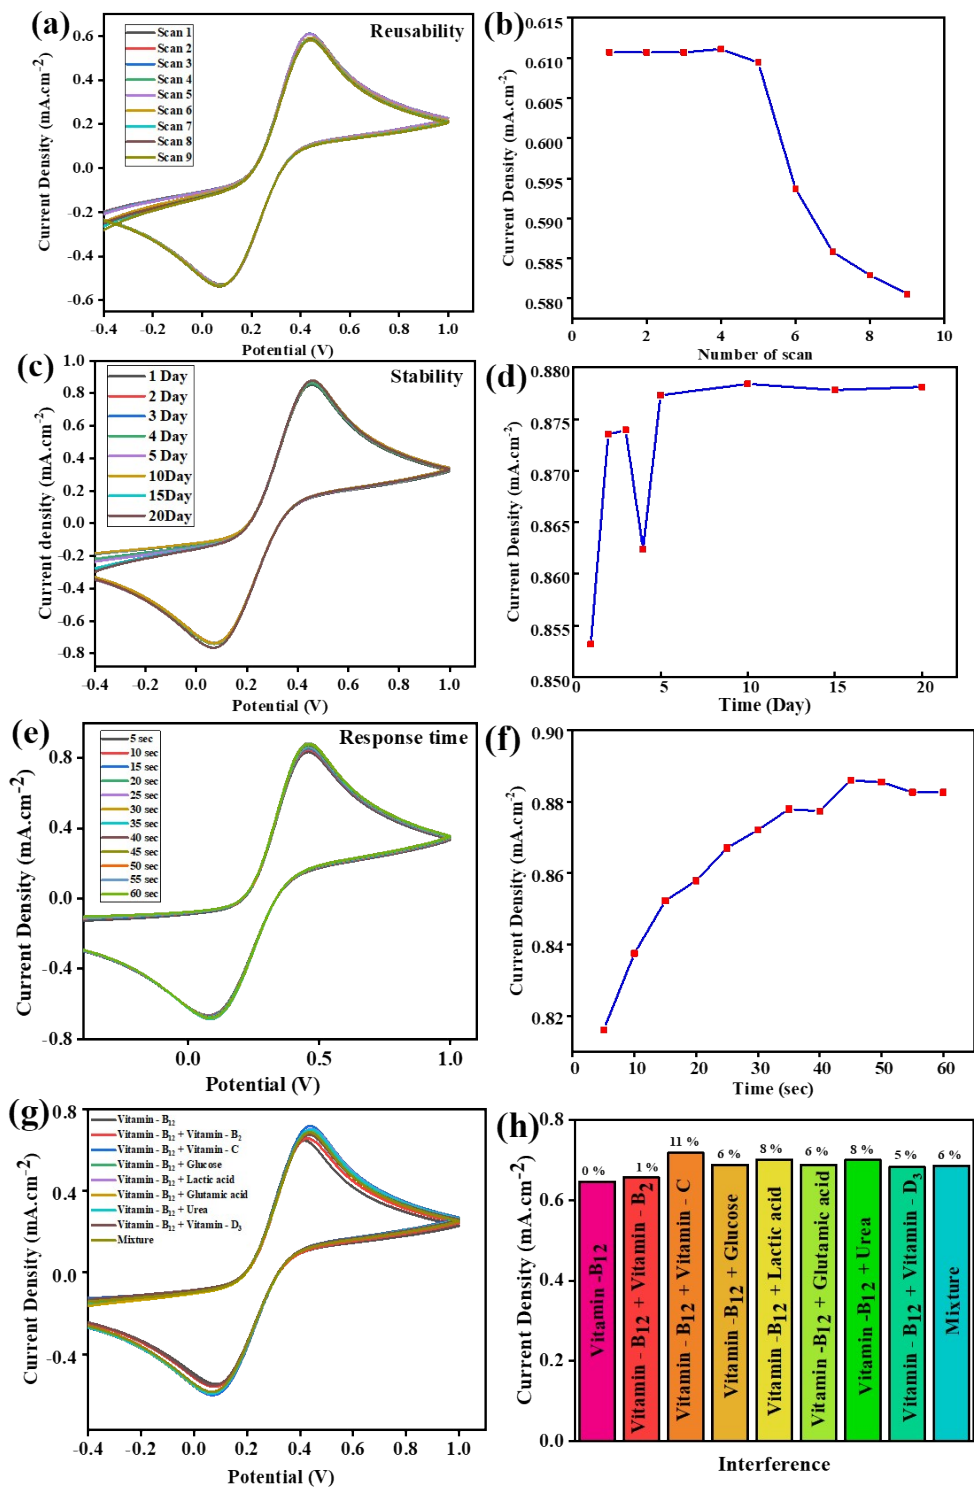

**Figure S2.** Cyclic voltammetry studies of B-MgO NPs/ITO bioelectrode in  $[Fe(CN)_6]^{3-/4-}$  contains phosphate buffer (0.9% NaCl, pH 7.5) at scan rate of 50 mV/s in the potential range of -0.8 to 1.0 V. (a&b) Reusability CV curve and linear graph, (c&d) Stability CV curve and linear

*graph, (e&f) Response time CV curve and linear graph and (g&h) CV curve and Bar graph of Interference study of Vit-B<sub>12</sub> by prepared biosensor B-MgO NPs/ITO bioelectrode.*
